# Supplementary material for: Preparation of a PEGylated liposome that co-encapsulates l-arginine and doxorubicin to achieve a synergistic anticancer effect
Source: Royal Society of Chemistry journal article supplement (doi:10.1039/d1ra06514a), 2021-01-01
Supplement: d1ra06514a1.pdf [file d1ra06514a1.pdf]

### Supplementary information

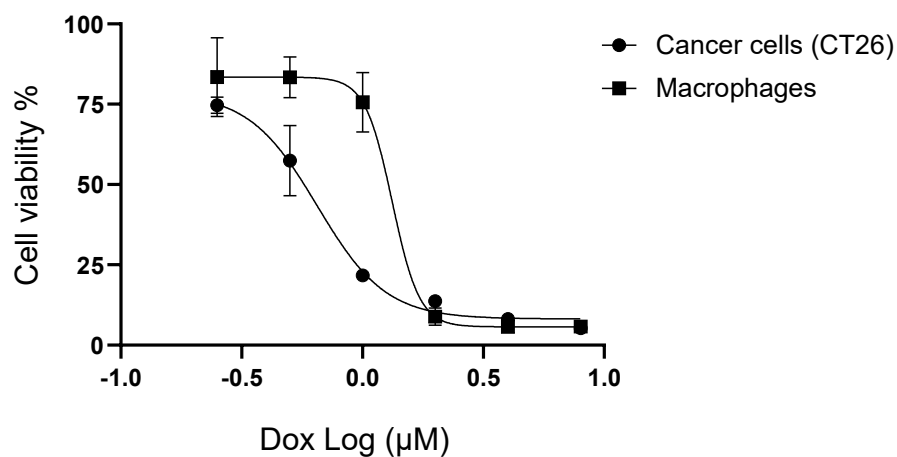

**Figure S1.** The difference of Dox sensitivity towards cancer cells (CT26) and RAW 264.7 macrophages. Cell viability in increasing concentrations of Dox was determined by CCK8 assay and is expressed as a percentage of the control value. The results are expressed as mean  $\pm$  SD (n = 3).

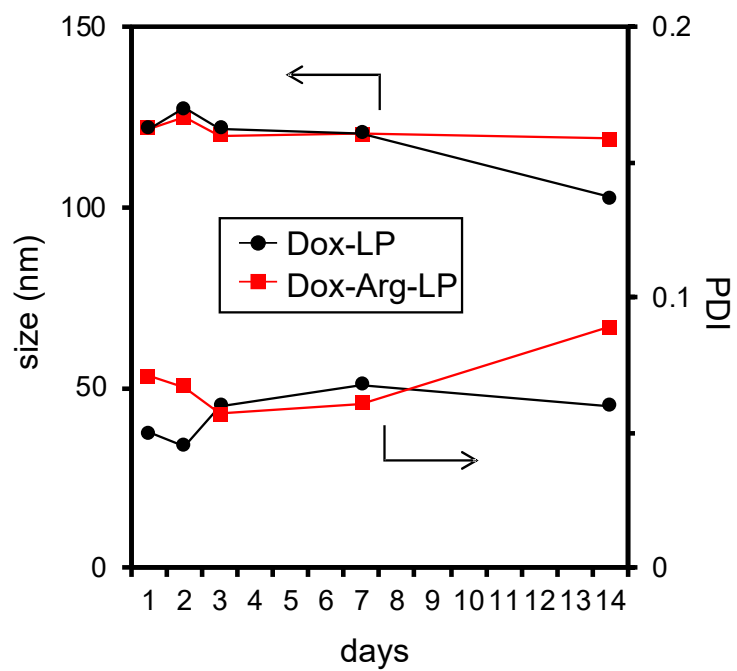

**Figure S2.** Stability of liposomes during the storage at pH 7.4 and 4 °C evaluated by size and PDI.
